# Supplementary material for: Construction of Differentiated Periodic Freight Train Paths in Dense Mixed Traffic
Source: MDPI journal article supplement (doi:10.3390/su13158330), 2021-07-26

Praha-Libeň seř. n. - Dresden Hbf.

131,42 km

Fahrplanbearbeitungssystem FBS-Bahn | IPLAN 1.7.7 | Vlastník licence CVUT Praha

15

16

17

18

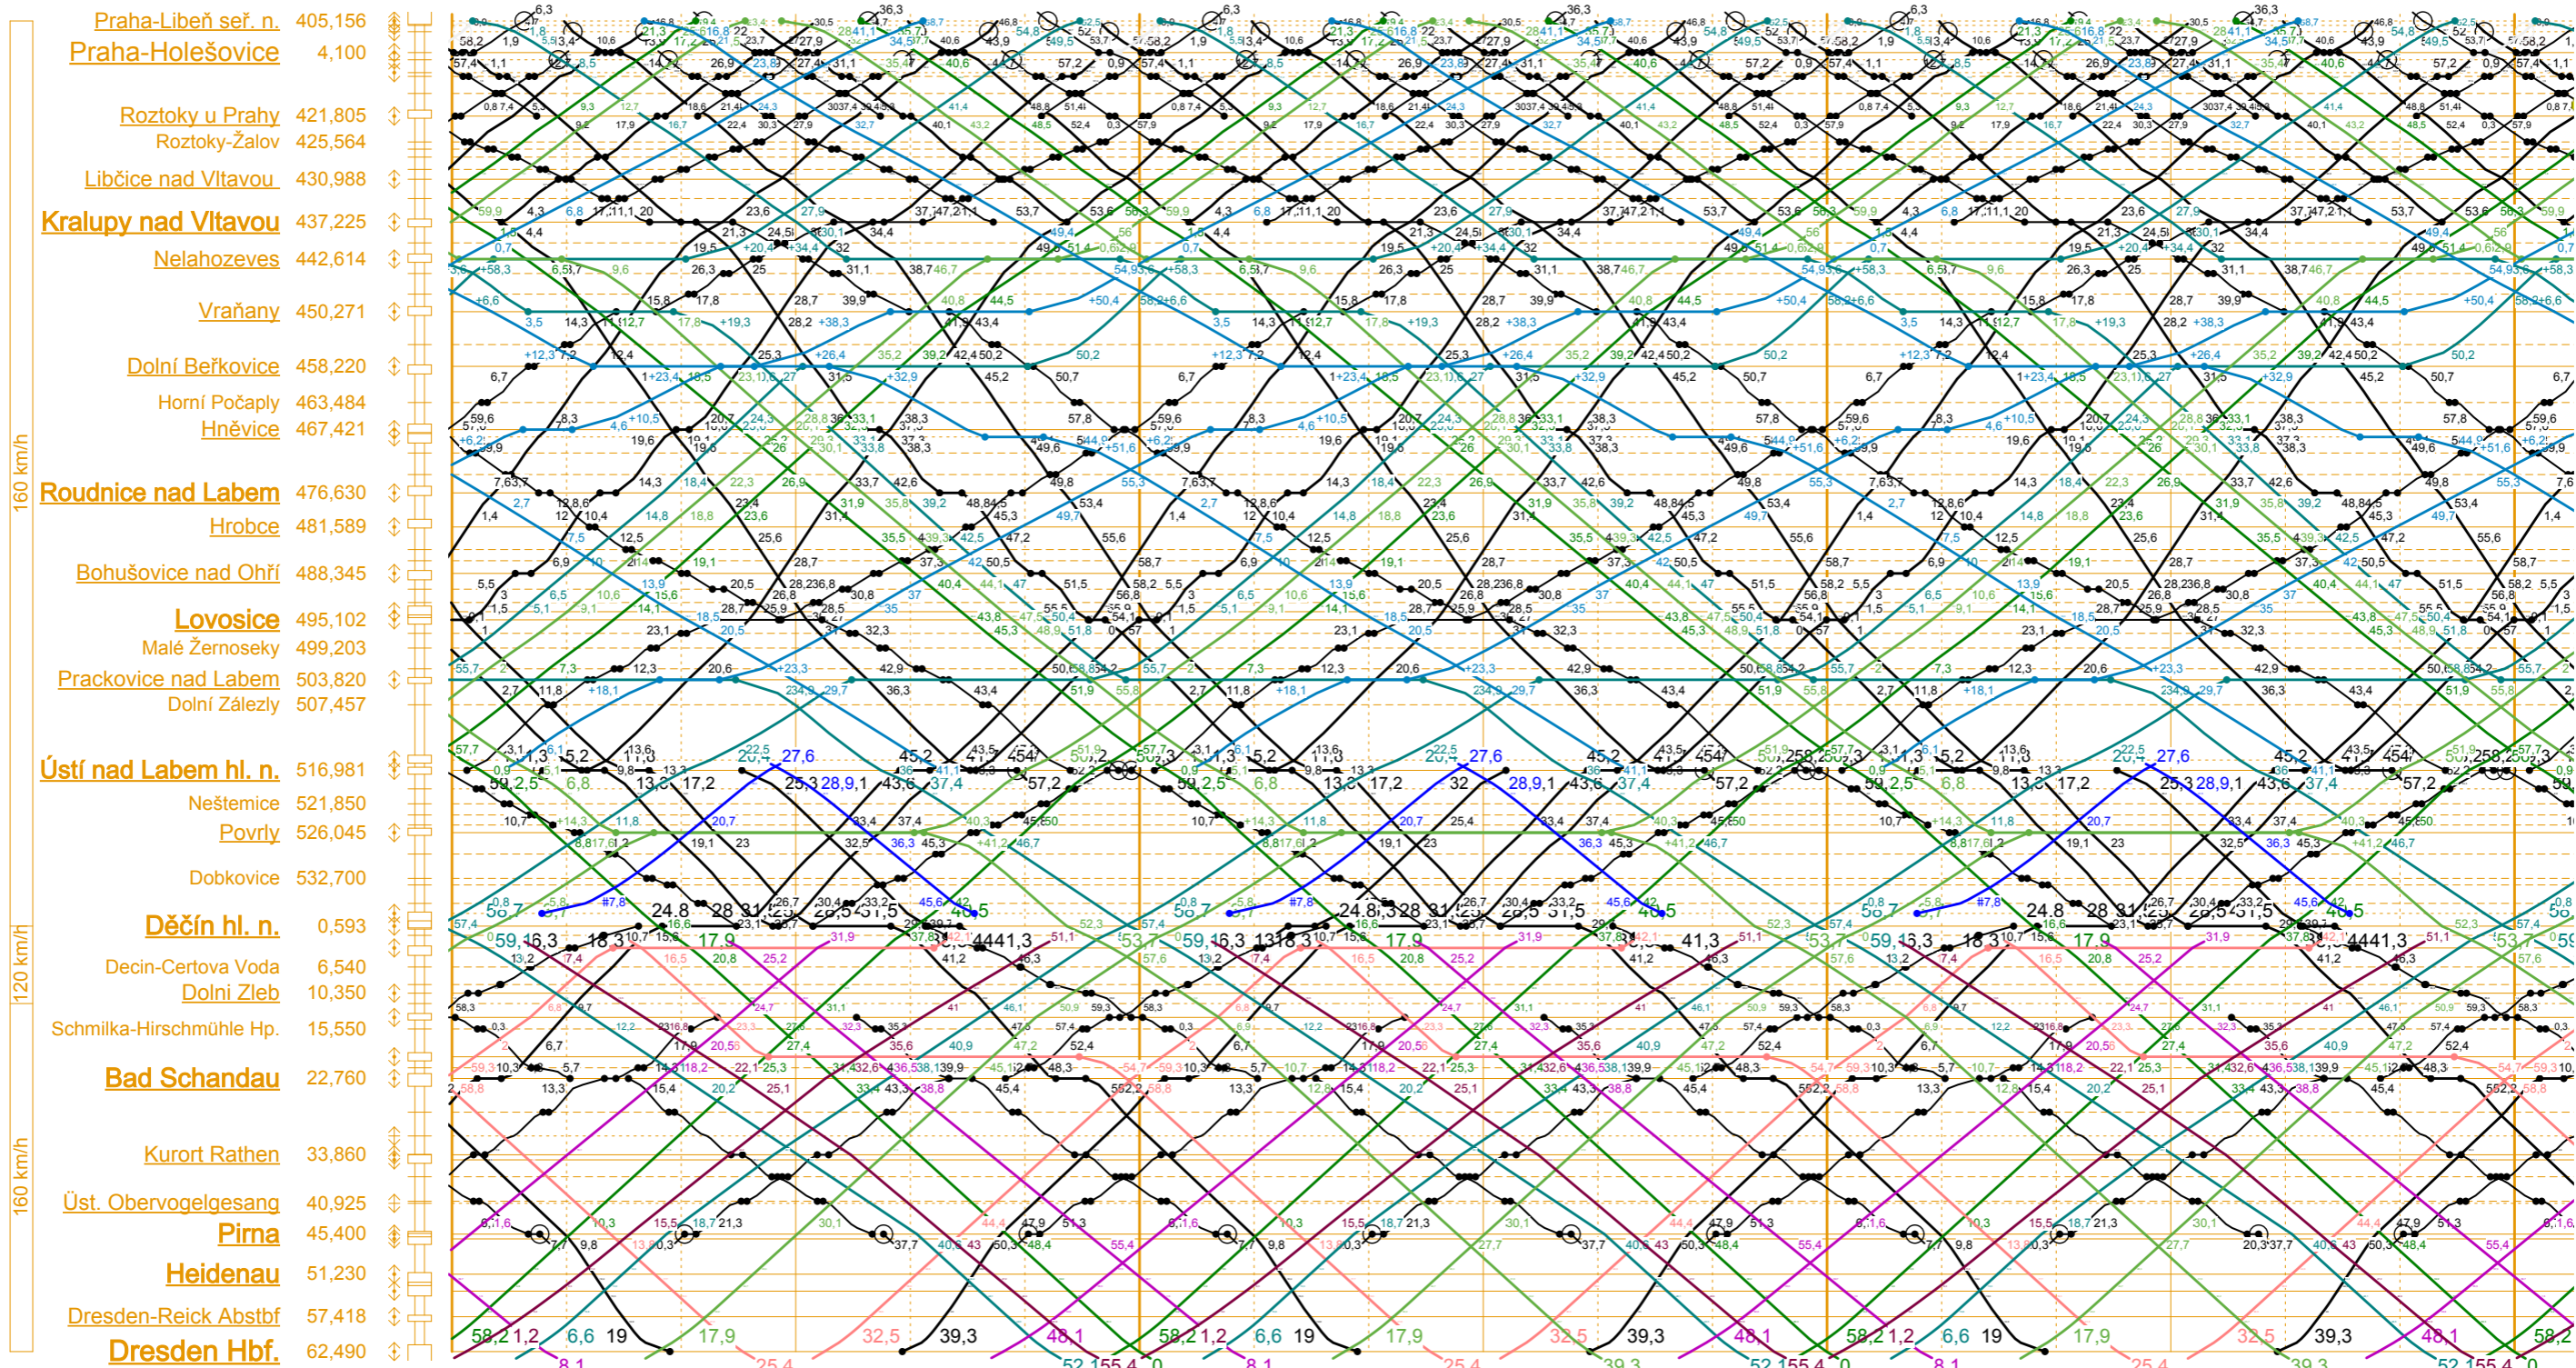

Supplement: s1 [file s1]
